# Supplementary material for: The Development of an Oral Solution Containing Nirmatrelvir and Ritonavir and Assessment of Its Pharmacokinetics and Stability
Source: MDPI journal article supplement (doi:10.3390/pharmaceutics16010109), 2024-01-14
Supplement: s1 [file s1]

## Supplementary Material:

### The development of an oral solution containing nirmatrelvir and ritonavir and assessment of its pharmacokinetics and stability

Lili Wang, Zhuang Ding, Zhengping Wang, Yanna Zhao, Hengqian Wu, Qipeng Wei, Lingfeng Gao, Jun Han

**Table S1.** The basic physical and chemical properties of NRV and RTV [1–3].

| Generic Name       | NRV                                                                                                                                                                                | RTV                                                                                                                                                                                              |
|--------------------|------------------------------------------------------------------------------------------------------------------------------------------------------------------------------------|--------------------------------------------------------------------------------------------------------------------------------------------------------------------------------------------------|
| Chemical name      | (1R,2S,5S)-N-((1S)-1-Cyano-2-((3S)-2-oxopyrrolidin-3-yl) ethyl)-3-((2S)-3,3-dimethyl-2-(2,2,2-trifluoroacetamido) butanoyl)-6,6-dimethyl-3-azabicyclo [3.1.0] hexane-2-carboxamide | 10-Hydroxy-2-methyl-5-(1-methylethyl)-1-[2-(1methylethyl)-4-thiazolyl]-3,6-dioxo-8,11-bis(phenylmethyl)-2,4,7,12-tetraazatridecan-13-oic acid, 5-thiazolylmethyl ester, [5S-(5R*,8R*,10R*,11R*)] |
| CAS                | 2628280-40-8                                                                                                                                                                       | 155213-67-5                                                                                                                                                                                      |
| Chemical Formula   | C <sub>23</sub> H <sub>32</sub> F <sub>3</sub> N <sub>5</sub> O <sub>4</sub>                                                                                                       | C <sub>37</sub> H <sub>48</sub> N <sub>6</sub> O <sub>5</sub> S <sub>2</sub>                                                                                                                     |
| Molecular Weight   | 499.54                                                                                                                                                                             | 720.95                                                                                                                                                                                           |
| State              | A non-hygroscopic, white to pale-colored crystalline powder                                                                                                                        | A non-hygroscopic, a white to light tan powder                                                                                                                                                   |
| Structure          | 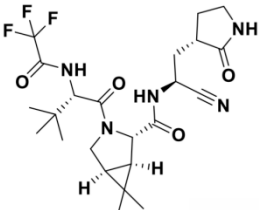                                                                                                |                                                                                                              |
| Solubility         | It has low solubility in water and buffered aqueous media.                                                                                                                         | It is almost insoluble in water.                                                                                                                                                                 |
| pKa                | –                                                                                                                                                                                  | 2.01 and 2.51                                                                                                                                                                                    |
| Melting point      | about 192 °C                                                                                                                                                                       | about 123 °C                                                                                                                                                                                     |
| Logp               | 0.845(predictive)                                                                                                                                                                  | The partition coefficient in the n-octanol-phosphate buffer (0.05 mol/L, pH = 7.4) system was $4.7 \times 10^4$                                                                                  |
| BCS classification | BCS II / IV                                                                                                                                                                        | BCS II                                                                                                                                                                                           |

|          | Shape                                                                             |                                                                                   |                                                                                   | Description                              | Manufacture                                    |
|----------|-----------------------------------------------------------------------------------|-----------------------------------------------------------------------------------|-----------------------------------------------------------------------------------|------------------------------------------|------------------------------------------------|
|          | front                                                                             | back                                                                              | side                                                                              |                                          |                                                |
| Paxovid® |  |  |  | A pink film-coated tablet                | Dry granulation                                |
|          | length<br>17.5 mm                                                                 | width<br>8.5 mm                                                                   | thickness<br>5.7 mm                                                               |                                          |                                                |
| Paxovid® |  |  |  | A white to off-white, film-coated tablet | Hot melt extrusion, amorphous solid dispersion |
|          | length<br>17.1 mm                                                                 | width<br>9.1 mm                                                                   | thickness<br>6 mm                                                                 |                                          |                                                |

**Figure**

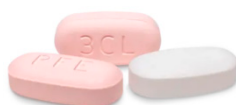

BCS: biopharmaceutical classification system; NRV: nirmatrelvir; RTV: ritonavir; -: no data.

**Table S2.** Selected marketed products containing cosolvent-based systems [4].

| Drug substance        | BCS     | Trade name | Indication     | Company              | Formulation                                                                                                              |
|-----------------------|---------|------------|----------------|----------------------|--------------------------------------------------------------------------------------------------------------------------|
| Ritonavir             | II      | Norvir®    | HIV infections | AbbVie               | ethanol, water, polyoxyl 35 castor oil, propylene glycol                                                                 |
| Lopinavir / Ritonavir | II / II | Kaletra®   | HIV infections | AbbVie               | ethanol, propylene glycol, polyoxyl 40 hydrogenated castor oil, povidone                                                 |
| Tipranavir            | II      | Aptivus®   | HIV antiviral  | Boehringer Ingelheim | polyethylene glycol, vitamin E polyethylene glycol succinate, water, propylene glycol                                    |
| Cyclosporine          | II      | Neoral®    | Anti-immune    | Novartis             | alcohol, propylene glycol, corn oil-mono-di-triglycerides, polyoxyl 40 hydrogenated castor oil, DL- $\alpha$ -tocopherol |
| Amprenavir            | II      | Agenerase® | HIV antiviral  | GSK                  | polyethylene glycol 400, propylene glycol, vitamin E polyethylene glycol succinate                                       |
| Nimodipine            | II      | Nymalize®  | Hypotensive    | Azurity              | ethanol, glycerin, methylparaben, polyethylene glycol 400                                                                |

BCS: biopharmaceutical classification system.

**Table S3.** Solubility of NRV and RTV in different organic solvents.

|                  | Concentration of NRV (mg/mL) * | Concentration of RTV (mg/mL) [1]. |
|------------------|--------------------------------|-----------------------------------|
| Ethanol          | 16.5<S<33                      | 165                               |
| Ethyl acetate    | >57                            | 1.5                               |
| Propylene glycol | <1.6                           | >200                              |

\* Crude concentration.

## References

1. J.P. Pharmaceuticals and Medical Devices Agency, The interview form of Paxlovid®. Available online: <https://www.pmda.go.jp/PmdaSearch/iyakuDetail/GeneralList/62501B5> (accessed on 07 October 2023).
2. EMA European Medicines Agency, Overview of Paxlovid®. Available online: <https://www.ema.europa.eu/en/medicines/human/EPAR/paxlovid> (accessed on 05 October 2023).
3. Wu, H.; Wang, Z.; Zhao, Y.; Gao, Y.; Wang, L.; Zhang, H.; Bu, R.; Ding, Z.; Han, J. Effect of Different Seed Crystals on the Supersaturation State of Ritonavir Tablets Prepared by Hot-Melt Extrusion. *Eur. J. Pharm. Sci.* **2023**, *185*, 106440.
4. U.S. Food and Drug Administration, Paxlovid® (nirmatrelvir co-packaged with ritonavir) for the treatment of mild-to-moderate coronavirus disease 2019 (COVID-19) in certain adults and pediatric patients. Available online: <https://www.fda.gov/media/155049/download> (accessed on 08 October 2023).
